# Supplementary material
Source: HighWire-hosted journal article supplement (https://learnmem.cshlp.org/content/suppl/2023/01/31/30.2.36)
Supplement: Supplemental_Figure_Legend.docx [file Supplemental_Figure_Legend.docx]

**Supplementary Figure 1: Confidence ratings across groups and sessions.** (a) Distribution of confidence as rated by participants. (b) Average error rates for each confidence level. Error bars represent standard errors of the mean for all objects.
